# Supplementary material
Source: publisher figshare collection journal article supplement (https://acs.figshare.com/ndownloader/files/8523427)
Supplement: Supplementary file 1 [file 8523427]

data_General
_audit_creation_date                    2015-12-25
_audit_creation_method                 'by CrystalStructure 4.0'
_audit_update_record                    ?

#==============================================================================
# PROCESSING SUMMARY (IUCr Office Use Only)

_journal_date_recd_electronic           ?
_journal_date_from_coeditor             ?
_journal_date_accepted                  ?
_journal_coeditor_code                  ?

#==============================================================================
# SUBMISSION DETAILS

_publ_contact_author_name              'ENTER NAME'
_publ_contact_author_email             'ENTER EMAIL ADDRESS'
_publ_contact_author_fax               'ENTER FAX NUMBER'
_publ_contact_author_phone             'ENTER PHONE NUMBER'
_publ_contact_letter
;
    ENTER TEXT OF LETTER
;
_publ_requested_journal                'ENTER JOURNAL NAME HERE'
_publ_requested_category               'FO'
_publ_requested_coeditor_name           ?

#==============================================================================
# TITLE AND AUTHOR LIST

_publ_section_title
;
    ENTER SECTION TITLE
;
_publ_section_title_footnote
;
    ENTER FOOTNOTE TO TITLE OF PAPER
;
loop_
_publ_author_name
_publ_author_footnote
_publ_author_address
' FIRST AUTHORS NAME '
;
  FIRST AUTHORS FOOTNOTES
;
;
  FIRST AUTHORS ADDRESS
;
_publ_section_synopsis
;
    ENTER SYNOPSIS
;

#==============================================================================
# TEXT

_publ_section_abstract
;
    ENTER ABSTRACT
;
_publ_section_comment
;
    ENTER TEXT
;
_publ_section_references
;
    ENTER OTHER REFERENCES

    Rigaku (2010). CrystalStructure. Version 4.0. 
    Rigaku Corporation, Tokyo, Japan.

    Altomare, A., Cascarano, G., Giacovazzo, C., Guagliardi, A., 
    Burla, M., Polidori, G., and Camalli, M. (1994) J. Appl. Cryst., 27, 435. 
    SIR92

    Sheldrick, G.M. (2008), Acta Cryst. A64, 112-122.

    Rigaku (1998). REQAB. 
    Rigaku Corporation, Tokyo, Japan.

;
_publ_section_figure_captions
;
    ENTER FIGURE CAPTIONS
;
_publ_section_exptl_prep
;
    ENTER COMPOUND PREPARATION DETAILS
;
_publ_section_exptl_refinement
;
    ENTER SPECIAL DETAILS OF THE REFINEMENT
;

#==============================================================================
data_2015_12_24

#==============================================================================
# CHEMICAL DATA

_chemical_formula_sum                  'C18 H18 O S Si'
_chemical_formula_moiety               'C18 H18 O S Si'
_chemical_formula_weight                310.49
_chemical_melting_point                 ?
_chemical_absolute_configuration        ab

#==============================================================================
# CRYSTAL DATA
_symmetry_cell_setting                  monoclinic
_symmetry_space_group_name_H-M         'C 1 2 1'
_symmetry_space_group_name_Hall        'C 2y'
_symmetry_Int_Tables_number             5
loop_
_symmetry_equiv_pos_site_id
_symmetry_equiv_pos_as_xyz
1   '+X,+Y,+Z'
2   '-X,+Y,-Z'
3   '1/2+X,1/2+Y,+Z'
4   '1/2-X,1/2+Y,-Z'
#------------------------------------------------------------------------------
_cell_length_a                          18.039(6)
_cell_length_b                          6.960(3)
_cell_length_c                          12.854(4)
_cell_angle_alpha                       90.0000
_cell_angle_beta                        91.218(5)
_cell_angle_gamma                       90.0000
_cell_volume                            1613.4(10)
_cell_formula_units_Z                   4
_cell_measurement_reflns_used           2708
_cell_measurement_theta_min             3.53
_cell_measurement_theta_max             27.47
_cell_measurement_temperature           113
#------------------------------------------------------------------------------
_exptl_crystal_description              block
_exptl_crystal_colour                   colorless
_exptl_crystal_size_max                 0.400
_exptl_crystal_size_mid                 0.330
_exptl_crystal_size_min                 0.220
_exptl_crystal_density_diffrn           1.278
_exptl_crystal_density_meas             ?
_exptl_crystal_density_method          'not measured'
_exptl_crystal_F_000                    656.00
_exptl_absorpt_coefficient_mu           0.271
_exptl_absorpt_correction_type          multi-scan
_exptl_absorpt_process_details         'REQAB (Rigaku, 1998)'
_exptl_absorpt_correction_T_min         0.858
_exptl_absorpt_correction_T_max         0.942

#==============================================================================
# EXPERIMENTAL DATA

_diffrn_ambient_temperature             113
_diffrn_radiation_type                 'Mo K\a'
_diffrn_radiation_wavelength            0.71070
_diffrn_measurement_device_type        'Rigaku Saturn724'
_diffrn_measurement_method              \w
_diffrn_detector_area_resol_mean        7.111
_diffrn_reflns_number                   5940
_diffrn_reflns_av_R_equivalents         0.0174
_diffrn_reflns_theta_max                27.49
_diffrn_reflns_theta_full               27.49
_diffrn_measured_fraction_theta_max     0.964
_diffrn_measured_fraction_theta_full    0.964
_diffrn_reflns_limit_h_min             -23
_diffrn_reflns_limit_h_max              23
_diffrn_reflns_limit_k_min             -9
_diffrn_reflns_limit_k_max              7
_diffrn_reflns_limit_l_min             -11
_diffrn_reflns_limit_l_max              16
_diffrn_standards_number                0
_diffrn_standards_interval_count        .
_diffrn_standards_decay_%               ?

#==============================================================================
# REFINEMENT DATA

_refine_special_details
;
    Refinement was performed using all reflections. The weighted 
    R-factor (wR) and goodness of fit (S) are based on F^2^.
    R-factor (gt) are based on F. The threshold expression of
    F^2^ > 2.0 sigma(F^2^) is used only for calculating R-factor (gt).
;
_reflns_number_total                    3240
_reflns_number_gt                       3126
_reflns_threshold_expression            F^2^>2.0\s(F^2^)
_refine_ls_structure_factor_coef        Fsqd
_refine_ls_R_factor_gt                  0.0262
_refine_ls_wR_factor_ref                0.0647
_refine_ls_number_restraints            1
_refine_ls_hydrogen_treatment           constr
_refine_ls_number_reflns                3240
_refine_ls_number_parameters            190
_refine_ls_goodness_of_fit_ref          1.038
_refine_ls_weighting_scheme             calc
_refine_ls_weighting_details
           'w = 1/[\s^2^(Fo^2^)+(0.0374P)^2^+0.5005P] where P=(Fo^2^+2Fc^2^)/3'
_atom_sites_solution_hydrogens          geom
_atom_sites_solution_primary            direct
_atom_sites_solution_secondary          difmap
_refine_ls_shift/su_max                 0.000
_refine_diff_density_max                0.200
_refine_diff_density_min               -0.160
_refine_ls_extinction_method            none
_refine_ls_extinction_coef              ?
_refine_ls_abs_structure_details
           'Flack, H. D. (1983), Acta Cryst. A39, 876-881.  1309 Friedel Pairs'
_refine_ls_abs_structure_Flack         -0.04(6)

loop_
_atom_type_symbol
_atom_type_description
_atom_type_scat_dispersion_real
_atom_type_scat_dispersion_imag
_atom_type_scat_source
  'C' 'C'  0.0033 0.0016 
;
International Tables for Crystallography
(1992, Vol. C, Tables 4.2.6.8 and 6.1.1.4)
;
  'H' 'H'  0.0000 0.0000 
;
International Tables for Crystallography
(1992, Vol. C, Table 6.1.1.4)
;
  'O' 'O'  0.0106 0.0060 
;
International Tables for Crystallography
(1992, Vol. C, Tables 4.2.6.8 and 6.1.1.4)
;
  'S' 'S'  0.1246 0.1234 
;
International Tables for Crystallography
(1992, Vol. C, Tables 4.2.6.8 and 6.1.1.4)
;
  'Si' 'Si'  0.0817 0.0704 
;
International Tables for Crystallography
(1992, Vol. C, Tables 4.2.6.8 and 6.1.1.4)
;

#==============================================================================
# ATOMIC COORDINATES AND THERMAL PARAMETERS

loop_
_atom_site_label
_atom_site_type_symbol
_atom_site_fract_x
_atom_site_fract_y
_atom_site_fract_z
_atom_site_U_iso_or_equiv
_atom_site_adp_type
_atom_site_occupancy
_atom_site_symmetry_multiplicity
_atom_site_calc_flag
_atom_site_refinement_flags
_atom_site_disorder_assembly
_atom_site_disorder_group
 S1 S -0.04943(2) 0.16972(6) 0.31585(3) 0.02547(11) Uani 1.0 4 d . . .
 Si2 Si 0.10673(2) 0.07992(6) 0.22253(3) 0.01431(10) Uani 1.0 4 d . . .
 O3 O 0.10148(6) 0.34011(17) 0.03568(8) 0.0198(3) Uani 1.0 4 d . . .
 C4 C 0.20392(8) -0.2085(3) 0.30295(11) 0.0172(3) Uani 1.0 4 d . . .
 C5 C 0.03784(8) 0.2444(3) 0.28071(11) 0.0167(3) Uani 1.0 4 d . . .
 C6 C 0.18272(8) 0.2317(3) 0.16826(11) 0.0152(3) Uani 1.0 4 d . . .
 C7 C 0.14814(8) -0.0767(3) 0.32709(10) 0.0146(3) Uani 1.0 4 d . . .
 C8 C 0.31040(8) 0.3478(3) 0.17709(11) 0.0197(3) Uani 1.0 4 d . . .
 C9 C 0.17111(8) 0.3508(3) 0.08079(11) 0.0156(3) Uani 1.0 4 d . . .
 C10 C 0.23481(8) -0.3299(3) 0.37799(12) 0.0201(3) Uani 1.0 4 d . . .
 C11 C 0.12382(8) -0.0734(3) 0.43027(11) 0.0158(3) Uani 1.0 4 d . . .
 C12 C 0.20973(8) -0.3236(3) 0.47944(11) 0.0190(3) Uani 1.0 4 d . . .
 C13 C 0.22707(9) 0.4675(3) 0.04283(12) 0.0190(4) Uani 1.0 4 d . . .
 C14 C 0.25357(8) 0.2343(3) 0.21491(12) 0.0172(3) Uani 1.0 4 d . . .
 C15 C 0.06176(9) -0.0830(3) 0.12490(12) 0.0253(4) Uani 1.0 4 d . . .
 C16 C 0.29665(8) 0.4643(3) 0.09197(12) 0.0198(4) Uani 1.0 4 d . . .
 C17 C 0.08800(9) 0.4446(3) -0.05885(12) 0.0219(4) Uani 1.0 4 d . . .
 C18 C 0.15398(8) -0.1966(3) 0.50519(12) 0.0188(4) Uani 1.0 4 d . . .
 C19 C -0.07210(9) 0.3892(3) 0.36558(14) 0.0314(4) Uani 1.0 4 d . . .
 C20 C 0.04685(9) 0.4340(3) 0.30737(14) 0.0270(4) Uani 1.0 4 d . . .
 C21 C -0.01573(10) 0.5161(3) 0.35575(17) 0.0360(5) Uani 1.0 4 d . . .
 H4 H 0.2210 -0.2149 0.2337 0.0207 Uiso 1.0 4 calc R . .
 H8 H 0.3582 0.3453 0.2095 0.0236 Uiso 1.0 4 calc R . .
 H10 H 0.2730 -0.4170 0.3600 0.0241 Uiso 1.0 4 calc R . .
 H11 H 0.0861 0.0146 0.4492 0.0189 Uiso 1.0 4 calc R . .
 H12 H 0.2308 -0.4063 0.5310 0.0228 Uiso 1.0 4 calc R . .
 H13 H 0.2180 0.5480 -0.0157 0.0227 Uiso 1.0 4 calc R . .
 H14 H 0.2631 0.1561 0.2743 0.0206 Uiso 1.0 4 calc R . .
 H15A H 0.0236 -0.1596 0.1586 0.0303 Uiso 1.0 4 calc R . .
 H15B H 0.0991 -0.1687 0.0959 0.0303 Uiso 1.0 4 calc R . .
 H15C H 0.0389 -0.0063 0.0689 0.0303 Uiso 1.0 4 calc R . .
 H16 H 0.3352 0.5434 0.0665 0.0238 Uiso 1.0 4 calc R . .
 H17A H 0.0882 0.5827 -0.0440 0.0263 Uiso 1.0 4 calc R . .
 H17B H 0.0397 0.4076 -0.0888 0.0263 Uiso 1.0 4 calc R . .
 H17C H 0.1269 0.4150 -0.1084 0.0263 Uiso 1.0 4 calc R . .
 H18 H 0.1363 -0.1935 0.5742 0.0226 Uiso 1.0 4 calc R . .
 H19 H -0.1182 0.4185 0.3962 0.0377 Uiso 1.0 4 calc R . .
 H20 H 0.0910 0.5039 0.2946 0.0324 Uiso 1.0 4 calc R . .
 H21 H -0.0178 0.6457 0.3787 0.0432 Uiso 1.0 4 calc R . .


loop_
_atom_site_aniso_label
_atom_site_aniso_U_11
_atom_site_aniso_U_22
_atom_site_aniso_U_33
_atom_site_aniso_U_12
_atom_site_aniso_U_13
_atom_site_aniso_U_23
 S1 0.01586(17) 0.0245(3) 0.0363(3) -0.00404(16) 0.00694(15) 0.00049(18)
 Si2 0.01336(17) 0.0164(2) 0.01311(18) -0.00211(15) 0.00013(13) 0.00109(16)
 O3 0.0165(5) 0.0250(6) 0.0179(5) -0.0003(5) -0.0015(4) 0.0073(5)
 C4 0.0188(7) 0.0177(8) 0.0153(7) -0.0019(6) 0.0025(6) -0.0026(6)
 C5 0.0121(6) 0.0208(8) 0.0173(7) -0.0029(6) -0.0008(5) 0.0036(6)
 C6 0.0159(7) 0.0173(8) 0.0126(7) -0.0007(6) 0.0023(5) -0.0020(6)
 C7 0.0148(6) 0.0133(7) 0.0156(7) -0.0034(6) 0.0004(5) 0.0005(6)
 C8 0.0162(7) 0.0226(9) 0.0203(8) -0.0028(6) 0.0008(6) -0.0039(7)
 C9 0.0159(7) 0.0151(8) 0.0158(7) 0.0012(6) 0.0019(5) -0.0021(6)
 C10 0.0185(7) 0.0166(8) 0.0251(8) 0.0013(7) 0.0006(6) -0.0017(7)
 C11 0.0137(6) 0.0170(8) 0.0166(7) -0.0021(6) 0.0019(5) -0.0005(6)
 C12 0.0185(7) 0.0175(8) 0.0208(7) -0.0022(7) -0.0023(6) 0.0033(7)
 C13 0.0224(8) 0.0179(9) 0.0167(7) -0.0008(6) 0.0033(6) 0.0021(7)
 C14 0.0191(7) 0.0180(8) 0.0144(7) -0.0020(6) 0.0003(6) -0.0023(6)
 C15 0.0288(8) 0.0284(10) 0.0185(8) -0.0081(7) -0.0038(6) -0.0021(7)
 C16 0.0197(7) 0.0178(9) 0.0222(8) -0.0055(6) 0.0059(6) -0.0011(6)
 C17 0.0232(8) 0.0235(9) 0.0189(8) 0.0002(7) -0.0034(6) 0.0064(7)
 C18 0.0189(7) 0.0226(9) 0.0151(7) -0.0041(6) 0.0024(6) 0.0012(6)
 C19 0.0193(8) 0.0365(12) 0.0388(10) 0.0014(7) 0.0081(7) -0.0060(9)
 C20 0.0166(7) 0.0237(10) 0.0407(10) -0.0034(7) 0.0035(7) -0.0047(8)
 C21 0.0236(9) 0.0293(11) 0.0552(13) 0.0012(8) 0.0040(8) -0.0133(9)

#==============================================================================
_computing_data_collection             'CrystalClear (Rigaku/MSC Inc., 2006)'
_computing_cell_refinement              CrystalClear
_computing_data_reduction               CrystalClear
_computing_structure_solution          'SIR92 (Altomare, et al., 1994)'
_computing_structure_refinement        'SHELXL97 (Sheldrick, 2008)'
_computing_publication_material        'CrystalStructure 4.0 (Rigaku, 2010)'
_computing_molecular_graphics          'CrystalStructure 4.0'

#==============================================================================
# MOLECULAR GEOMETRY

_geom_special_details
;
    ENTER SPECIAL DETAILS OF THE MOLECULAR GEOMETRY
;

loop_
_geom_bond_atom_site_label_1
_geom_bond_atom_site_label_2
_geom_bond_distance
_geom_bond_publ_flag
_geom_bond_site_symmetry_1
_geom_bond_site_symmetry_2
S1 C5 1.7271(16) yes . .
S1 C19 1.709(2) yes . .
Si2 C5 1.8585(16) yes . .
Si2 C6 1.8766(16) yes . .
Si2 C7 1.8736(15) yes . .
Si2 C15 1.8641(18) yes . .
O3 C9 1.3742(19) yes . .
O3 C17 1.432(2) yes . .
C4 C7 1.401(3) yes . .
C4 C10 1.390(3) yes . .
C5 C20 1.372(3) yes . .
C6 C9 1.409(2) yes . .
C6 C14 1.400(2) yes . .
C7 C11 1.406(2) yes . .
C8 C14 1.390(3) yes . .
C8 C16 1.380(3) yes . .
C9 C13 1.392(3) yes . .
C10 C12 1.390(3) yes . .
C11 C18 1.391(3) yes . .
C12 C18 1.385(3) yes . .
C13 C16 1.393(3) yes . .
C19 C21 1.355(3) yes . .
C20 C21 1.421(3) yes . .
C4 H4 0.950 no . .
C8 H8 0.950 no . .
C10 H10 0.950 no . .
C11 H11 0.950 no . .
C12 H12 0.950 no . .
C13 H13 0.950 no . .
C14 H14 0.950 no . .
C15 H15A 0.980 no . .
C15 H15B 0.980 no . .
C15 H15C 0.980 no . .
C16 H16 0.950 no . .
C17 H17A 0.980 no . .
C17 H17B 0.980 no . .
C17 H17C 0.980 no . .
C18 H18 0.950 no . .
C19 H19 0.950 no . .
C20 H20 0.950 no . .
C21 H21 0.950 no . .

loop_
_geom_angle_atom_site_label_1
_geom_angle_atom_site_label_2
_geom_angle_atom_site_label_3
_geom_angle
_geom_angle_publ_flag
_geom_angle_site_symmetry_1
_geom_angle_site_symmetry_2
_geom_angle_site_symmetry_3
C5 S1 C19 93.17(8) yes . . .
C5 Si2 C6 107.63(8) yes . . .
C5 Si2 C7 109.25(7) yes . . .
C5 Si2 C15 111.13(8) yes . . .
C6 Si2 C7 108.11(7) yes . . .
C6 Si2 C15 113.76(8) yes . . .
C7 Si2 C15 106.87(8) yes . . .
C9 O3 C17 117.88(12) yes . . .
C7 C4 C10 121.56(14) yes . . .
S1 C5 Si2 122.74(10) yes . . .
S1 C5 C20 109.15(12) yes . . .
Si2 C5 C20 128.05(12) yes . . .
Si2 C6 C9 122.03(11) yes . . .
Si2 C6 C14 121.04(12) yes . . .
C9 C6 C14 116.92(14) yes . . .
Si2 C7 C4 119.95(11) yes . . .
Si2 C7 C11 122.64(12) yes . . .
C4 C7 C11 117.38(13) yes . . .
C14 C8 C16 119.31(14) yes . . .
O3 C9 C6 115.07(13) yes . . .
O3 C9 C13 123.16(14) yes . . .
C6 C9 C13 121.76(14) yes . . .
C4 C10 C12 119.89(15) yes . . .
C7 C11 C18 121.15(14) yes . . .
C10 C12 C18 119.79(15) yes . . .
C9 C13 C16 119.01(15) yes . . .
C6 C14 C8 122.07(14) yes . . .
C8 C16 C13 120.92(15) yes . . .
C11 C18 C12 120.23(14) yes . . .
S1 C19 C21 111.21(14) yes . . .
C5 C20 C21 113.92(16) yes . . .
C19 C21 C20 112.55(19) yes . . .
C7 C4 H4 119.218 no . . .
C10 C4 H4 119.222 no . . .
C14 C8 H8 120.345 no . . .
C16 C8 H8 120.341 no . . .
C4 C10 H10 120.059 no . . .
C12 C10 H10 120.055 no . . .
C7 C11 H11 119.422 no . . .
C18 C11 H11 119.424 no . . .
C10 C12 H12 120.105 no . . .
C18 C12 H12 120.108 no . . .
C9 C13 H13 120.486 no . . .
C16 C13 H13 120.506 no . . .
C6 C14 H14 118.964 no . . .
C8 C14 H14 118.967 no . . .
Si2 C15 H15A 109.472 no . . .
Si2 C15 H15B 109.472 no . . .
Si2 C15 H15C 109.471 no . . .
H15A C15 H15B 109.470 no . . .
H15A C15 H15C 109.464 no . . .
H15B C15 H15C 109.479 no . . .
C8 C16 H16 119.546 no . . .
C13 C16 H16 119.534 no . . .
O3 C17 H17A 109.472 no . . .
O3 C17 H17B 109.474 no . . .
O3 C17 H17C 109.474 no . . .
H17A C17 H17B 109.466 no . . .
H17A C17 H17C 109.470 no . . .
H17B C17 H17C 109.471 no . . .
C11 C18 H18 119.886 no . . .
C12 C18 H18 119.889 no . . .
S1 C19 H19 124.398 no . . .
C21 C19 H19 124.395 no . . .
C5 C20 H20 123.042 no . . .
C21 C20 H20 123.041 no . . .
C19 C21 H21 123.725 no . . .
C20 C21 H21 123.722 no . . .

loop_
_geom_torsion_atom_site_label_1
_geom_torsion_atom_site_label_2
_geom_torsion_atom_site_label_3
_geom_torsion_atom_site_label_4
_geom_torsion
_geom_torsion_publ_flag
_geom_torsion_site_symmetry_1
_geom_torsion_site_symmetry_2
_geom_torsion_site_symmetry_3
_geom_torsion_site_symmetry_4
C5 S1 C19 C21 0.25(12) no . . . .
C19 S1 C5 Si2 176.85(10) no . . . .
C19 S1 C5 C20 -0.31(11) no . . . .
C5 Si2 C6 C9 -68.86(12) no . . . .
C5 Si2 C6 C14 109.71(11) no . . . .
C6 Si2 C5 S1 166.63(9) no . . . .
C6 Si2 C5 C20 -16.78(14) no . . . .
C5 Si2 C7 C4 -177.55(10) no . . . .
C5 Si2 C7 C11 4.69(13) no . . . .
C7 Si2 C5 S1 -76.21(11) no . . . .
C7 Si2 C5 C20 100.37(13) no . . . .
C15 Si2 C5 S1 41.47(12) no . . . .
C15 Si2 C5 C20 -141.95(12) no . . . .
C6 Si2 C7 C4 -60.70(12) no . . . .
C6 Si2 C7 C11 121.54(11) no . . . .
C7 Si2 C6 C9 173.25(10) no . . . .
C7 Si2 C6 C14 -8.19(13) no . . . .
C15 Si2 C6 C9 54.72(13) no . . . .
C15 Si2 C6 C14 -126.71(11) no . . . .
C15 Si2 C7 C4 62.13(12) no . . . .
C15 Si2 C7 C11 -115.63(11) no . . . .
C17 O3 C9 C6 -174.61(12) no . . . .
C17 O3 C9 C13 4.3(2) no . . . .
C7 C4 C10 C12 0.7(3) no . . . .
C10 C4 C7 Si2 -178.59(12) no . . . .
C10 C4 C7 C11 -0.7(2) no . . . .
S1 C5 C20 C21 0.29(17) no . . . .
Si2 C5 C20 C21 -176.67(10) no . . . .
Si2 C6 C9 O3 -3.04(19) no . . . .
Si2 C6 C9 C13 178.00(10) no . . . .
Si2 C6 C14 C8 -178.98(10) no . . . .
C9 C6 C14 C8 -0.3(3) no . . . .
C14 C6 C9 O3 178.34(12) no . . . .
C14 C6 C9 C13 -0.6(2) no . . . .
Si2 C7 C11 C18 177.67(10) no . . . .
C4 C7 C11 C18 -0.1(2) no . . . .
C14 C8 C16 C13 -0.9(3) no . . . .
C16 C8 C14 C6 1.1(3) no . . . .
O3 C9 C13 C16 -178.05(12) no . . . .
C6 C9 C13 C16 0.8(3) no . . . .
C4 C10 C12 C18 0.1(3) no . . . .
C7 C11 C18 C12 1.0(3) no . . . .
C10 C12 C18 C11 -0.9(3) no . . . .
C9 C13 C16 C8 -0.1(3) no . . . .
S1 C19 C21 C20 -0.1(2) no . . . .
C5 C20 C21 C19 -0.1(3) no . . . .

loop_
_geom_contact_atom_site_label_1
_geom_contact_atom_site_label_2
_geom_contact_distance
_geom_contact_publ_flag
_geom_contact_site_symmetry_1
_geom_contact_site_symmetry_2
Si2 O3 3.0078(14) no . .
O3 C5 3.440(2) no . .
O3 C15 3.246(3) no . .
C4 C6 3.535(3) no . .
C4 C14 3.409(3) no . .
C4 C15 3.511(3) no . .
C4 C18 2.770(3) no . .
C5 C11 3.296(3) no . .
C6 C16 2.809(3) no . .
C6 C20 3.372(3) no . .
C7 C12 2.816(3) no . .
C7 C14 3.240(3) no . .
C8 C9 2.777(3) no . .
C10 C11 2.776(3) no . .
C13 C14 2.776(3) no . .
C13 C17 2.809(3) no . .
O3 C17 3.513(3) no . 2_555
C9 C16 3.544(3) no . 4_545
C10 C18 3.559(3) no . 4_546
C12 C18 3.578(3) no . 4_546
C16 C9 3.544(3) no . 4_555
C17 O3 3.513(3) no . 2_555
C17 C17 3.546(3) no . 2_555
C18 C10 3.559(3) no . 4_556
C18 C12 3.578(3) no . 4_556
S1 H11 3.1472 no . .
S1 H15A 3.3443 no . .
S1 H20 3.4536 no . .
S1 H21 3.4544 no . .
Si2 H4 2.9106 no . .
Si2 H11 2.9796 no . .
Si2 H14 2.9327 no . .
Si2 H20 3.1081 no . .
O3 H13 2.6465 no . .
O3 H15C 2.6994 no . .
O3 H20 3.5273 no . .
C4 H11 3.2597 no . .
C4 H12 3.2648 no . .
C4 H14 2.7803 no . .
C4 H15B 3.2435 no . .
C5 H11 2.8155 no . .
C5 H15A 3.2279 no . .
C5 H15C 3.2343 no . .
C5 H19 3.4314 no . .
C5 H21 3.2323 no . .
C6 H4 3.2895 no . .
C6 H8 3.2949 no . .
C6 H13 3.3028 no . .
C6 H15B 3.2927 no . .
C6 H15C 3.3106 no . .
C6 H20 3.0140 no . .
C7 H10 3.2892 no . .
C7 H14 2.7290 no . .
C7 H15A 3.1410 no . .
C7 H15B 3.1484 no . .
C7 H18 3.2905 no . .
C8 H13 3.2694 no . .
C9 H14 3.2558 no . .
C9 H15C 3.4450 no . .
C9 H16 3.2574 no . .
C9 H17A 2.7049 no . .
C9 H17B 3.2110 no . .
C9 H17C 2.5817 no . .
C9 H20 3.3092 no . .
C10 H18 3.2582 no . .
C11 H4 3.2592 no . .
C11 H12 3.2649 no . .
C12 H4 3.2592 no . .
C12 H11 3.2597 no . .
C13 H8 3.2702 no . .
C13 H17A 2.8373 no . .
C13 H17C 2.6504 no . .
C14 H4 3.1915 no . .
C14 H16 3.2482 no . .
C15 H4 3.2989 no . .
C16 H14 3.2432 no . .
C17 H13 2.5031 no . .
C18 H10 3.2584 no . .
C19 H20 3.1991 no . .
C20 H11 3.5056 no . .
C20 H19 3.2136 no . .
H4 H10 2.3297 no . .
H4 H14 2.7387 no . .
H4 H15B 2.8125 no . .
H8 H14 2.3303 no . .
H8 H16 2.3282 no . .
H10 H12 2.3423 no . .
H11 H18 2.3316 no . .
H12 H18 2.3347 no . .
H13 H16 2.3439 no . .
H13 H17A 2.3741 no . .
H13 H17B 3.4717 no . .
H13 H17C 2.2110 no . .
H15C H17B 3.5220 no . .
H19 H21 2.4187 no . .
H20 H21 2.4659 no . .
S1 H8 3.1059 no . 3_445
S1 H10 3.3204 no . 3_455
S1 H11 3.2882 no . 2_556
S1 H17B 3.3630 no . 2_555
S1 H17C 3.4382 no . 2_555
S1 H18 3.3065 no . 2_556
O3 H15B 3.5058 no . 1_565
O3 H16 2.7130 no . 4_545
O3 H17B 2.6914 no . 2_555
C4 H12 3.2034 no . 4_556
C4 H19 3.5134 no . 3_545
C4 H20 2.8569 no . 1_545
C5 H17B 3.0301 no . 2_555
C6 H13 2.9728 no . 4_545
C6 H16 3.2994 no . 4_545
C7 H12 3.0559 no . 4_556
C7 H20 3.1205 no . 1_545
C8 H4 3.5265 no . 1_565
C8 H10 2.9542 no . 1_565
C8 H13 2.9787 no . 4_545
C8 H17A 3.1323 no . 4_545
C8 H17C 3.3430 no . 4_545
C8 H18 3.3308 no . 4_556
C9 H13 3.0358 no . 4_545
C9 H15B 3.5943 no . 1_565
C9 H16 2.8577 no . 4_545
C10 H12 3.2275 no . 4_556
C10 H18 3.4827 no . 4_546
C10 H19 3.1691 no . 3_545
C10 H20 3.0170 no . 1_545
C11 H10 3.4214 no . 4_556
C11 H12 2.9026 no . 4_556
C11 H20 3.4644 no . 1_545
C11 H21 3.2739 no . 1_545
C12 H10 3.5128 no . 4_556
C12 H12 3.1005 no . 4_556
C12 H14 3.1962 no . 4_546
C12 H19 2.9351 no . 2_546
C12 H20 3.3850 no . 1_545
C13 H4 3.3053 no . 1_565
C13 H13 3.1050 no . 4_545
C13 H15B 3.5030 no . 1_565
C13 H16 3.4466 no . 4_545
C14 H10 3.0758 no . 1_565
C14 H12 3.4160 no . 4_556
C14 H13 2.9251 no . 4_545
C14 H17C 3.4038 no . 4_545
C14 H18 3.3643 no . 4_556
C15 H15C 3.0978 no . 2_555
C15 H16 3.2371 no . 4_545
C15 H17A 3.2248 no . 1_545
C16 H4 3.2042 no . 1_565
C16 H10 3.5769 no . 1_565
C16 H13 3.0678 no . 4_545
C16 H15B 3.2268 no . 4_555
C16 H17A 3.4357 no . 4_545
C16 H17C 3.4310 no . 4_555
C17 H8 3.5423 no . 4_555
C17 H15B 3.3502 no . 1_565
C17 H16 3.1199 no . 4_545
C17 H17A 3.5986 no . 2_555
C17 H17B 3.0263 no . 2_555
C18 H10 2.9031 no . 4_556
C18 H12 2.9428 no . 4_556
C18 H14 3.3382 no . 4_546
C18 H19 3.0392 no . 2_546
C18 H20 3.5822 no . 1_545
C18 H21 3.1020 no . 2_546
C19 H10 3.5140 no . 3_455
C19 H11 3.5440 no . 2_556
C19 H12 3.4857 no . 2_566
C19 H17C 3.4352 no . 2_555
C19 H18 3.2266 no . 2_566
C20 H15A 3.4350 no . 1_565
C20 H17B 3.1899 no . 2_555
C21 H15A 3.4773 no . 1_565
C21 H17B 3.5309 no . 2_555
C21 H18 3.1154 no . 2_566
C21 H21 3.5701 no . 2_556
H4 C8 3.5265 no . 1_545
H4 C13 3.3053 no . 1_545
H4 C16 3.2042 no . 1_545
H4 H13 3.5411 no . 4_545
H4 H16 3.4454 no . 1_545
H4 H17C 3.3344 no . 4_545
H4 H20 3.1666 no . 1_545
H8 S1 3.1059 no . 3_555
H8 C17 3.5423 no . 4_545
H8 H10 2.9946 no . 1_565
H8 H13 3.4966 no . 4_545
H8 H15A 3.0672 no . 3_555
H8 H17A 2.9810 no . 4_545
H8 H17C 3.2777 no . 4_545
H8 H18 2.7923 no . 4_556
H8 H21 3.3839 no . 3_545
H10 S1 3.3204 no . 3_545
H10 C8 2.9542 no . 1_545
H10 C11 3.4214 no . 4_546
H10 C12 3.5128 no . 4_546
H10 C14 3.0758 no . 1_545
H10 C16 3.5769 no . 1_545
H10 C18 2.9031 no . 4_546
H10 C19 3.5140 no . 3_545
H10 H8 2.9946 no . 1_545
H10 H11 3.5269 no . 4_546
H10 H14 3.1724 no . 1_545
H10 H18 2.6530 no . 4_546
H10 H19 3.0789 no . 3_545
H10 H20 3.4168 no . 1_545
H11 S1 3.2882 no . 2_556
H11 C19 3.5440 no . 2_556
H11 H10 3.5269 no . 4_556
H11 H11 3.3965 no . 2_556
H11 H12 3.3528 no . 4_556
H11 H19 3.4847 no . 2_556
H11 H21 3.2946 no . 1_545
H12 C4 3.2034 no . 4_546
H12 C7 3.0559 no . 4_546
H12 C10 3.2275 no . 4_546
H12 C11 2.9026 no . 4_546
H12 C12 3.1005 no . 4_546
H12 C14 3.4160 no . 4_546
H12 C18 2.9428 no . 4_546
H12 C19 3.4857 no . 2_546
H12 H11 3.3528 no . 4_546
H12 H14 2.5410 no . 4_546
H12 H18 3.4226 no . 4_546
H12 H19 2.5628 no . 2_546
H13 C6 2.9728 no . 4_555
H13 C8 2.9787 no . 4_555
H13 C9 3.0358 no . 4_555
H13 C13 3.1050 no . 4_555
H13 C14 2.9251 no . 4_555
H13 C16 3.0678 no . 4_555
H13 H4 3.5411 no . 4_555
H13 H8 3.4966 no . 4_555
H13 H14 3.4317 no . 4_555
H13 H15B 3.2664 no . 1_565
H14 C12 3.1962 no . 4_556
H14 C18 3.3382 no . 4_556
H14 H10 3.1724 no . 1_565
H14 H12 2.5410 no . 4_556
H14 H13 3.4317 no . 4_545
H14 H17C 3.3878 no . 4_545
H14 H18 2.8342 no . 4_556
H14 H19 3.1029 no . 3_545
H15A C20 3.4350 no . 1_545
H15A C21 3.4773 no . 1_545
H15A H8 3.0672 no . 3_445
H15A H15C 3.2896 no . 2_555
H15A H17A 3.3895 no . 1_545
H15A H17A 3.0529 no . 2_545
H15A H17B 3.3372 no . 2_545
H15A H20 3.1507 no . 1_545
H15A H21 3.2375 no . 1_545
H15B O3 3.5058 no . 1_545
H15B C9 3.5943 no . 1_545
H15B C13 3.5030 no . 1_545
H15B C16 3.2268 no . 4_545
H15B C17 3.3502 no . 1_545
H15B H13 3.2664 no . 1_545
H15B H15C 3.4267 no . 2_555
H15B H16 2.8362 no . 4_545
H15B H17A 2.5004 no . 1_545
H15B H20 3.4289 no . 1_545
H15C C15 3.0978 no . 2_555
H15C H15A 3.2896 no . 2_555
H15C H15B 3.4267 no . 2_555
H15C H15C 2.2368 no . 2_555
H15C H16 2.9110 no . 4_545
H15C H17A 3.3366 no . 1_545
H15C H17B 3.2229 no . 2_555
H16 O3 2.7130 no . 4_555
H16 C6 3.2994 no . 4_555
H16 C9 2.8577 no . 4_555
H16 C13 3.4466 no . 4_555
H16 C15 3.2371 no . 4_555
H16 C17 3.1199 no . 4_555
H16 H4 3.4454 no . 1_565
H16 H15B 2.8362 no . 4_555
H16 H15C 2.9110 no . 4_555
H16 H17A 3.5062 no . 4_545
H16 H17B 3.4025 no . 4_555
H16 H17C 2.7259 no . 4_555
H17A C8 3.1323 no . 4_555
H17A C15 3.2248 no . 1_565
H17A C16 3.4357 no . 4_555
H17A C17 3.5986 no . 2_555
H17A H8 2.9810 no . 4_555
H17A H15A 3.3895 no . 1_565
H17A H15A 3.0529 no . 2_565
H17A H15B 2.5004 no . 1_565
H17A H15C 3.3366 no . 1_565
H17A H16 3.5062 no . 4_555
H17A H17A 3.3986 no . 2_555
H17A H17B 3.1443 no . 2_555
H17B S1 3.3630 no . 2_555
H17B O3 2.6914 no . 2_555
H17B C5 3.0301 no . 2_555
H17B C17 3.0263 no . 2_555
H17B C20 3.1899 no . 2_555
H17B C21 3.5309 no . 2_555
H17B H15A 3.3372 no . 2_565
H17B H15C 3.2229 no . 2_555
H17B H16 3.4025 no . 4_545
H17B H17A 3.1443 no . 2_555
H17B H17B 2.7203 no . 2_555
H17B H20 3.5688 no . 2_555
H17C S1 3.4382 no . 2_555
H17C C8 3.3430 no . 4_555
H17C C14 3.4038 no . 4_555
H17C C16 3.4310 no . 4_545
H17C C19 3.4352 no . 2_555
H17C H4 3.3344 no . 4_555
H17C H8 3.2777 no . 4_555
H17C H14 3.3878 no . 4_555
H17C H16 2.7259 no . 4_545
H18 S1 3.3065 no . 2_556
H18 C8 3.3308 no . 4_546
H18 C10 3.4827 no . 4_556
H18 C14 3.3643 no . 4_546
H18 C19 3.2266 no . 2_546
H18 C21 3.1154 no . 2_546
H18 H8 2.7923 no . 4_546
H18 H10 2.6530 no . 4_556
H18 H12 3.4226 no . 4_556
H18 H14 2.8342 no . 4_546
H18 H19 2.7476 no . 2_546
H18 H21 2.4978 no . 2_546
H19 C4 3.5134 no . 3_455
H19 C10 3.1691 no . 3_455
H19 C12 2.9351 no . 2_566
H19 C18 3.0392 no . 2_566
H19 H10 3.0789 no . 3_455
H19 H11 3.4847 no . 2_556
H19 H12 2.5628 no . 2_566
H19 H14 3.1029 no . 3_455
H19 H18 2.7476 no . 2_566
H20 C4 2.8569 no . 1_565
H20 C7 3.1205 no . 1_565
H20 C10 3.0170 no . 1_565
H20 C11 3.4644 no . 1_565
H20 C12 3.3850 no . 1_565
H20 C18 3.5822 no . 1_565
H20 H4 3.1666 no . 1_565
H20 H10 3.4168 no . 1_565
H20 H15A 3.1507 no . 1_565
H20 H15B 3.4289 no . 1_565
H20 H17B 3.5688 no . 2_555
H21 C11 3.2739 no . 1_565
H21 C18 3.1020 no . 2_566
H21 C21 3.5701 no . 2_556
H21 H8 3.3839 no . 3_455
H21 H11 3.2946 no . 1_565
H21 H15A 3.2375 no . 1_565
H21 H18 2.4978 no . 2_566
H21 H21 3.1713 no . 2_556

#==============================================================================

#==============================================================================
# Additional structures and associated data_? identifiers
# should be added at this point if there is more than one 
# structure analysis in the CIF.

#==============================================================================
#     End of CIF
#==============================================================================
